# Supplementary material for: Next-generation RNA sequencing of FFPE subsections reveals highly conserved stromal reprogramming between canine and human mammary carcinoma
Source: PubMed Central journal article supplement (PMC6737962; doi:10.1242/dmm.040444), 2019-08-08
Supplement: dmm-12-040444-s1.pdf [file dmm-12-040444-s1.pdf]

**Figure S1: Selective isolation of cancer-associated stroma and normal stroma from canine simple mammary carcinomas by laser-capture-microdissection.** Representative images of tissue mounted on the slide to validate proper isolation of stromal cells were taken at x 10 magnification before dissection (A, D), after dissection (B, E), and of the cap containing the excised tissue sections (C, F). Images are from one representative case of simple mammary carcinoma: CAS (A-C) and normal stroma (D-F).

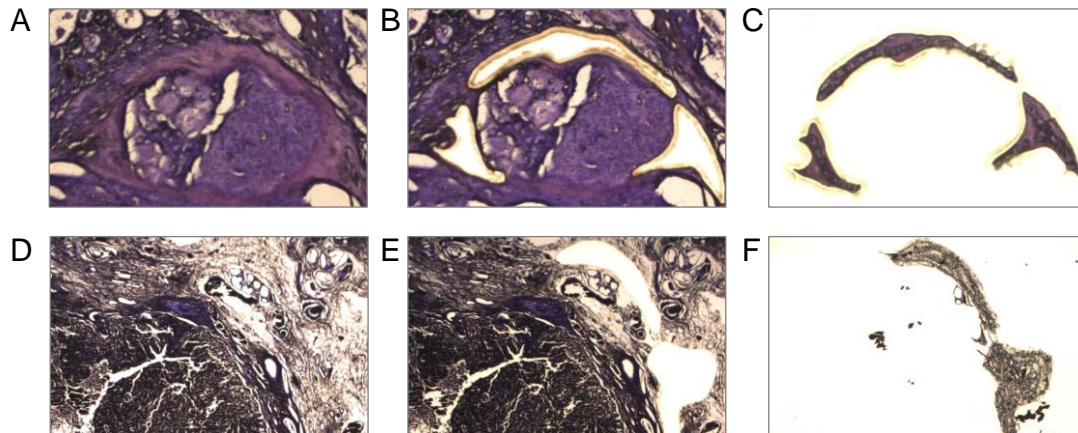

**Figure S2: Over-representation analysis of GO terms among significant genes in carcinoma data.** Association of significantly de-regulated genes identified in CAS compared to normal stroma in canine mammary carcinoma, with top 10 over-represented Gene Ontology (GO) terms associated with biological processes, cellular components, and molecular functions as presented in Figure 1D-I.

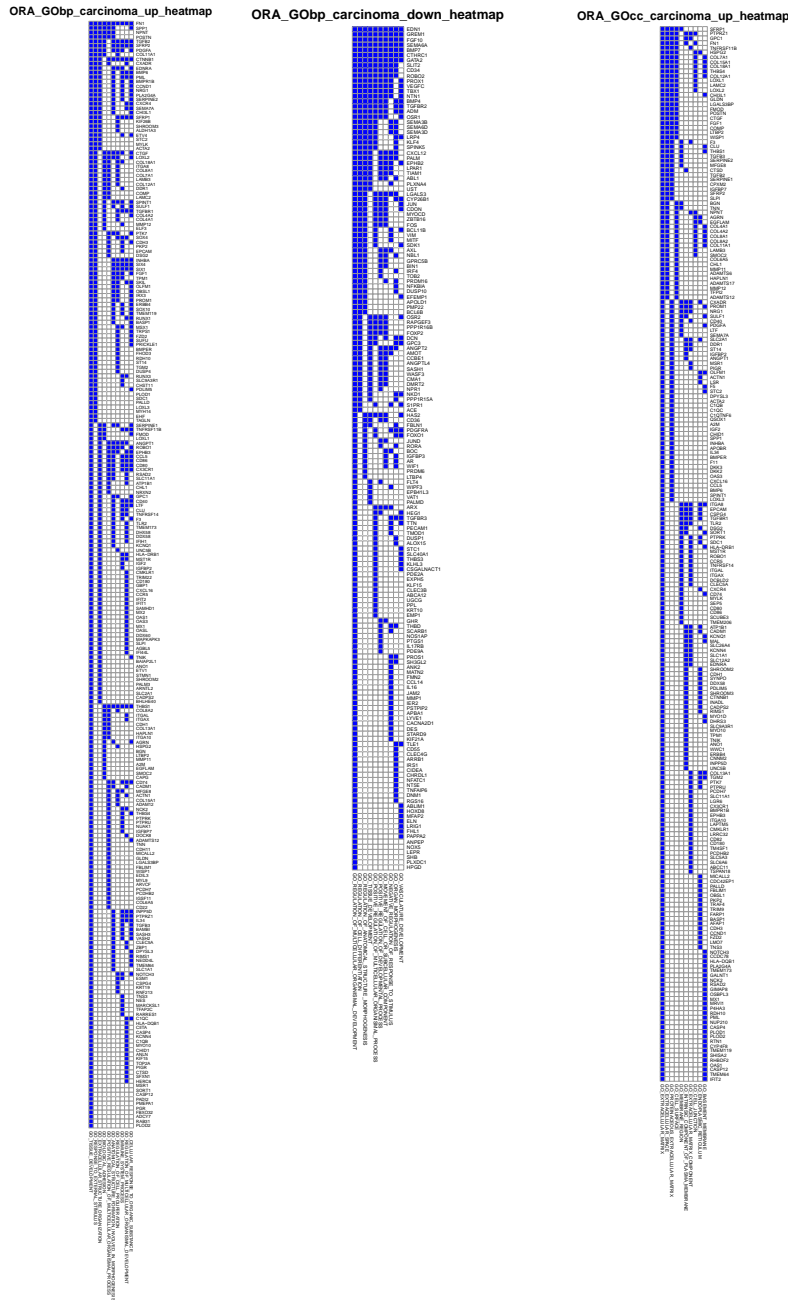

ORA\_GOcc\_carcinoma\_down\_heatmap

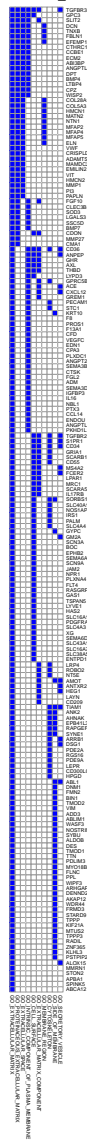

ORA\_GOmF\_carcinoma\_up\_heatmap

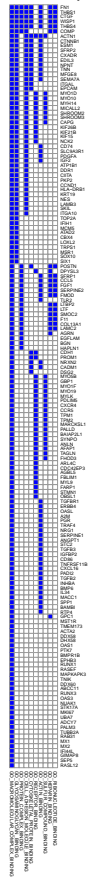

ORA\_GOmF\_carcinoma\_down\_heatmap

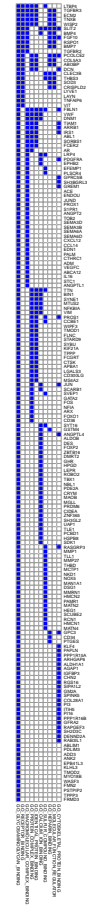

**Figure S3: Deconvolution of the cellular landscape of CAS and normal stroma in canine mammary carcinomas by xCell.** **above)** Deconvolution of the cellular landscape in CAS and normal stroma samples. **below)** List of abbreviations used by xCell for the different cell types analysed.

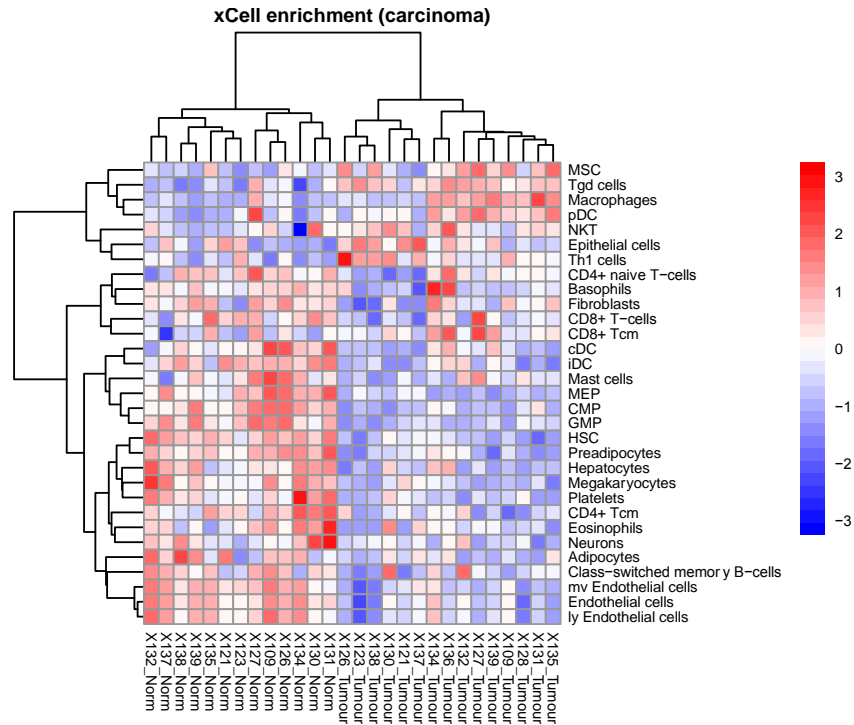

| Full name                           | Reported            |
|-------------------------------------|---------------------|
| Monocytes                           | Monocytes           |
| CD8+ T-cells                        | CD8+ T-cells        |
| NK cells                            | NK cells            |
| Macrophages                         | Macrophages         |
| Endothelial cells                   | Endothelial cells   |
| Dendritic cells                     | DC                  |
| Neutrophils                         | Neutrophils         |
| Erythrocytes                        | Erythrocytes        |
| CD4+ naive T-cells                  | CD4+ naive T-cells  |
| Multipotent progenitors             | MPP                 |
| Smooth muscle cells                 | Smooth muscle cells |
| Fibroblasts                         | Fibroblasts         |
| Epithelial cells                    | Epithelial cells    |
| Keratinocytes                       | Keratinocytes       |
| Chondrocytes                        | Chondrocytes        |
| Adipocytes                          | Adipocytes          |
| B-cells                             | B-cells             |
| CD4+ T-cells                        | CD4+ T-cells        |
| CD8+ effector memory T-cells        | CD8+ Tem            |
| Common myeloid progenitors          | CMP                 |
| Granulocyte-macrophage progenitors  | GMP                 |
| Megakaryocyte-erythroid progenitors | MEP                 |
| Regulatory T-cells                  | Tregs               |
| Hematopoietic stem cells            | HSC                 |
| Plasma cells                        | Plasma cells        |

|                                 |                               |
|---------------------------------|-------------------------------|
| CD4+ central memory T-cells     | CD4+ Tcm                      |
| Microvascular endothelial cells | mv Endothelial cells          |
| CD4+ effector memory T-cells    | CD4+ Tem                      |
| Memory B-cells                  | Memory B-cells                |
| CD8+ central memory T-cells     | CD8+ Tcm                      |
| naive B-cells                   | naive B-cells                 |
| Eosinophils                     | Eosinophils                   |
| Macrophages M1                  | Macrophages M1                |
| Myocytes                        | Myocytes                      |
| Lymphatic endothelial cells     | ly Endothelial cells          |
| Mesenchymal stem cells          | MSC                           |
| Macrophages M2                  | Macrophages M2                |
| Osteoblasts                     | Osteoblast                    |
| Activated dendritic cells       | aDC                           |
| Preadipocytes                   | Preadipocytes                 |
| Melanocytes                     | Melanocytes                   |
| Skeletal muscle cells           | Skeletal muscle cells         |
| CD4+ memory T-cells             | CD4+ memory T-cells           |
| Megakaryocytes                  | Megakaryocytes                |
| pro B-cells                     | pro B-cells                   |
| Basophils                       | Basophils                     |
| Conventional dendritic cells    | cDC                           |
| Astrocytes                      | Astrocytes                    |
| Plasmacytoid dendritic cells    | pDC                           |
| Pericytes                       | Pericytes                     |
| Neurons                         | Neurons                       |
| Class-switched memory B-cells   | Class-switched memory B-cells |
| Hepatocytes                     | Hepatocytes                   |
| Mesangial cells                 | Mesangial cells               |
| Immature dendritic cells        | iDC                           |
| Mast cells                      | Mast cells                    |
| Type 2 T-helper cells           | Th2 cells                     |
| Common lymphoid progenitors     | CLP                           |
| Platelets                       | Platelets                     |
| Type 1 T-helper cells           | Th1 cells                     |
| CD8+ naive T-cells              | CD8+ naive T-cells            |
| Natural killer T-cells          | NKT                           |
| Sebocytes                       | Sebocytes                     |
| Gamma delta T-cells             | Tgd cells                     |

**Figure S4: Cancer-associated stroma from canine and human mammary carcinomas displays a high grade of molecular homology.** Competitive gene set testing to compare canine CAS to human CAS. GSEA-like running sum statistic depicting the location of selected genes on a ranked list of genes in human IDC stroma compared to normal stroma (GSE35019). All upregulated genes identified in canine tumor stroma are indicated as red vertical bars, all down-regulated genes identified in canine tumor stroma are indicated as blue vertical bars.

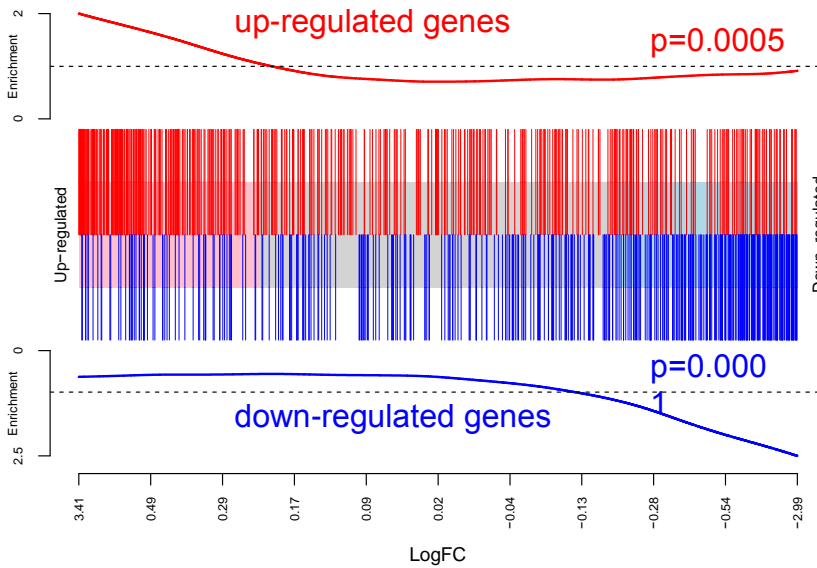

**Figure S5:** Barplot of library sizes demonstrating the number of quantified reads per sample.

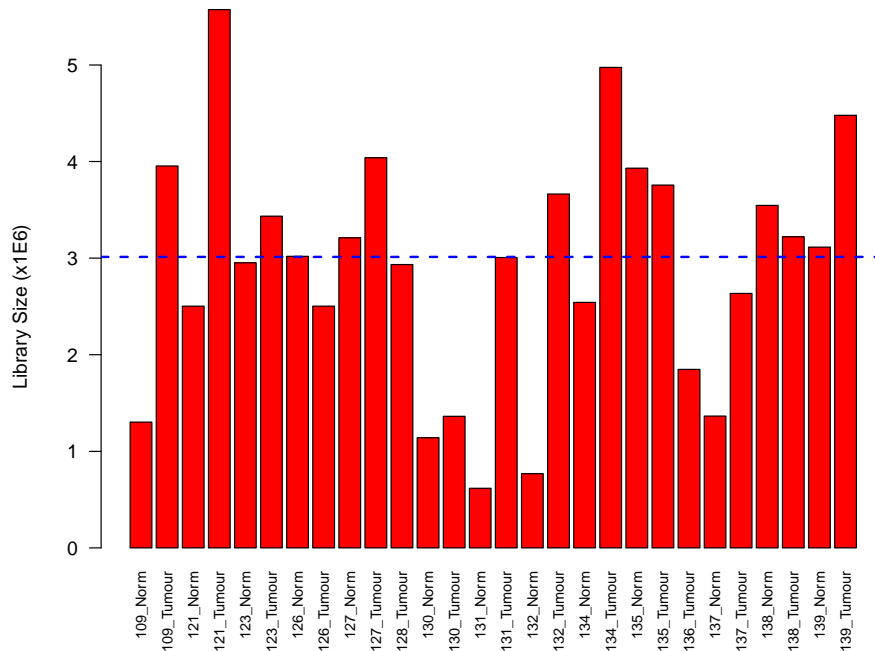

**Table S1.** Differentially expressed genes for CAS from canine carcinoma.

[Click here to Download Table S1](#)

**Table S2.** Full list of genes with breast cancer meta z-scores of the human orthologs of canine-derived CAS genes obtained from PRECOG database.

[Click here to Download Table S2](#)

**Table S3.** List of primers used for qRT-PCR. The “c” before each gene indicates that primers were designed to detect the canine isoforms of the intended targets.

| Gene Target     | Sequence                                                                                                         | Amplicon Length (nt) | Taqman® Number or custom design reference | Order |
|-----------------|------------------------------------------------------------------------------------------------------------------|----------------------|-------------------------------------------|-------|
| <i>cGAPDH</i>   | Fw: 5'-GCTGCCAAATATGACGACATCA-3'<br>Rev: 5'-GTAGCCCAGGATGCCTTTGAG-3'<br>Probe: 5'-TCCCTCCGATGCCTGCTTCACTACCTT-3' | 75                   | -                                         |       |
| <i>cPPIA</i>    | Manufacturer's proprietary information                                                                           | 92                   | Cf03986523_gH                             |       |
| <i>cB2M</i>     | Manufacturer's proprietary information                                                                           | 87                   | Cf02659077_m1                             |       |
| <i>cHMCN2</i>   | Manufacturer's proprietary information                                                                           | 76                   | Cf02654692_m1                             |       |
| <i>cCOL11A1</i> | Manufacturer's proprietary information                                                                           | 54                   | ARCE4CX                                   |       |
| <i>cCLEC4G</i>  | Manufacturer's proprietary information                                                                           | 69                   | Cf02647951_g1                             |       |
| <i>cSFRP2</i>   | Manufacturer's proprietary information                                                                           | 110                  | Cf02625033_m1                             |       |
| <i>cVIT</i>     | Manufacturer's proprietary information                                                                           | 68                   | Cf02657286_m1                             |       |
| <i>cTFPI2</i>   | Manufacturer's proprietary information                                                                           | 88                   | Cf02642366_m1                             |       |
| <i>cSTRA6</i>   | Manufacturer's proprietary information                                                                           | 61                   | Cf02661996_m1                             |       |
| <i>cIGF2</i>    | Manufacturer's proprietary information                                                                           | 111                  | Cf02647135_m1                             |       |
| <i>cPIGR</i>    | Manufacturer's proprietary information                                                                           | 70                   | Cf02625115_m1                             |       |
| <i>cSFRP1</i>   | Manufacturer's proprietary information                                                                           | 69                   | Cf02654440_m1                             |       |
| <i>cSCUBE2</i>  | Manufacturer's proprietary information                                                                           | 77                   | Cf02632274_m1                             |       |
| <i>cMMP2</i>    | Manufacturer's proprietary information                                                                           | 58                   | Cf02623423_m1                             |       |
| <i>cSDK1</i>    | Manufacturer's proprietary information                                                                           | 75                   | ARPRKXN                                   |       |

**Table S4.** Antibodies and conditions used for immunofluorescence. Basic/acidic antigen retrieval indicate 20 min incubation in pH 9.0 EDTA buffer or pH 6.0 citrate buffer in a pressure cooker set to 98°, respectively.

| Primary antibody         |                  |                   |                   |                         | Secondary antibody conditions                               |
|--------------------------|------------------|-------------------|-------------------|-------------------------|-------------------------------------------------------------|
| Antigen                  | Type             | Source            | Antigen retrieval | Dilution And incubation |                                                             |
| SMA (anti human)         | Monoclonal Mouse | M0851, Agilent    | None              | 1:400, RT, 1h           | goat anti mouse (Invitrogen A11005, 594) 1:400, 1 hour, RT  |
| Vimentin (anti mouse)    | Monoclonal Mouse | M7020, Agilent    | Basic             | 1: 150, RT, 1h          | goat anti mouse (Invitrogen A11005, 594) 1:400, 1 hour, RT  |
| Collagen IV (anti mouse) | Monoclonal Mouse | Bio-Rad 2150-1470 | Basic             | 1:50,4°C , over night   | goat anti rabbit (Invitrogen A11012, 594) 1:400, 1 hour, RT |



**Table S5.** Summary of RNA yield and quality of samples used in this study.

| Case # | Sample | Concentration (pg/ul) | Total yield (ng) | DV200 (%) |
|--------|--------|-----------------------|------------------|-----------|
| 1      | Normal | 2060                  | 62               | 79.68     |
|        | CAS    | 5870                  | 176              | 81.54     |
| 2      | Normal | 4020                  | 120              | 88.11     |
|        | CAS    | 3960                  | 118              | 86.92     |
| 3      | Normal | 322                   | 10               | 75.41     |
|        | CAS    | 2340                  | 70.2             | 75.39     |
| 4      | Normal | 392                   | 11.76            | 69.57     |
|        | CAS    | 1200                  | 36               | 77.09     |
| 5      | Normal | 1210                  | 36.3             | 68.02     |
|        | CAS    | 485                   | 14.5             | 70.06     |
| 6      | Normal | 443                   | 11.1             | 72.82     |
|        | CAS    | 1680                  | 42               | 80.63     |
| 7      | Normal | 1480                  | 44.4             | 83.55     |
|        | CAS    | 2870                  | 86.1             | 82.85     |
| 8      | Normal | 1330                  | 39.9             | 82.10     |
|        | CAS    | 1000                  | 30               | 78.73     |
| 9      | Normal | 1170                  | 35.1             | 71.67     |
|        | CAS    | 3440                  | 103.2            | 71.85     |
| 10     | Normal | 1540                  | 46.2             | 85.53     |
|        | CAS    | 1940                  | 58.2             | 80.88     |
| 11     | Normal | 895                   | 26.8             | 69.73     |
|        | CAS    | 1840                  | 55.2             | 74.59     |
| 12     | Normal | 565                   | 17               | 78.63     |
|        | CAS    | 1240                  | 37.2             | 83.47     |
| 13     | Normal | 405                   | 12.1             | 70.41     |
|        | CAS    | 1220                  | 36.6             | 72.67     |
| 14     | Normal | 901                   | 27               | 77.79     |
|        | CAS    | 6960                  | 209              | 79.17     |
| 15     | Normal | 1340                  | 40.2             | 77.80     |
|        | CAS    | 7000                  | 210              | 75.22     |
